# Supplementary material for: Meso–meso-linked porphyrin dimer as a novel scaffold for the selective binding of oligosaccharides
Source: Royal Society of Chemistry journal article supplement (doi:10.1039/b003365k), 2000-01-01
Supplement: b003365k.doc [file b003365k.doc]

### Supplementary Information

Meso–meso-linked porphyrin dimer as a novel scaffold for the selective binding of oligosaccharides

# Masato Ikeda, Seiji Shinkai* and Atsuhiro Osuka

**
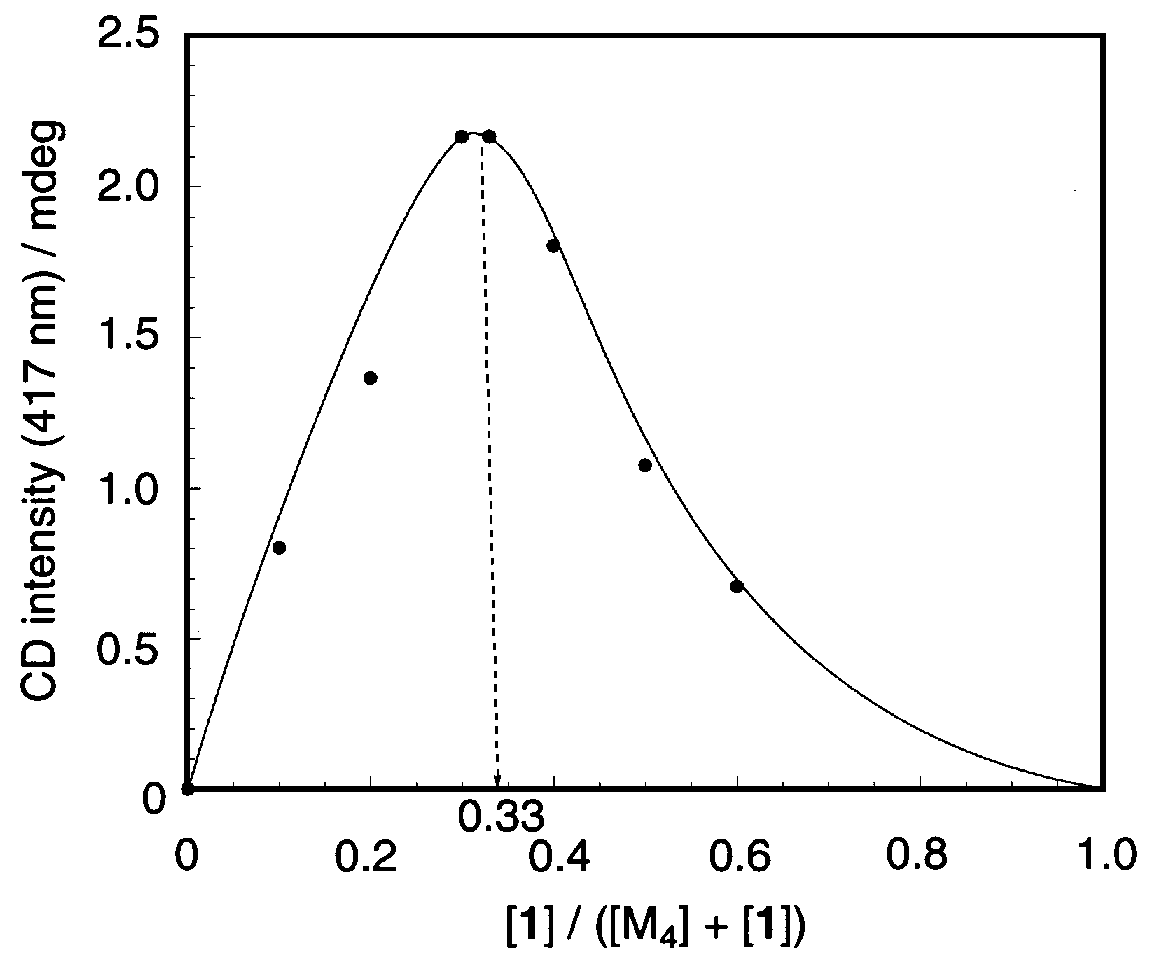
**

**Fig. A** Job plot for a **1** + M4 system with a 0.1 mm cell: the sum of [**1**] and [M4] was maintained constant (1.00 x 10–3 mol dm–3).


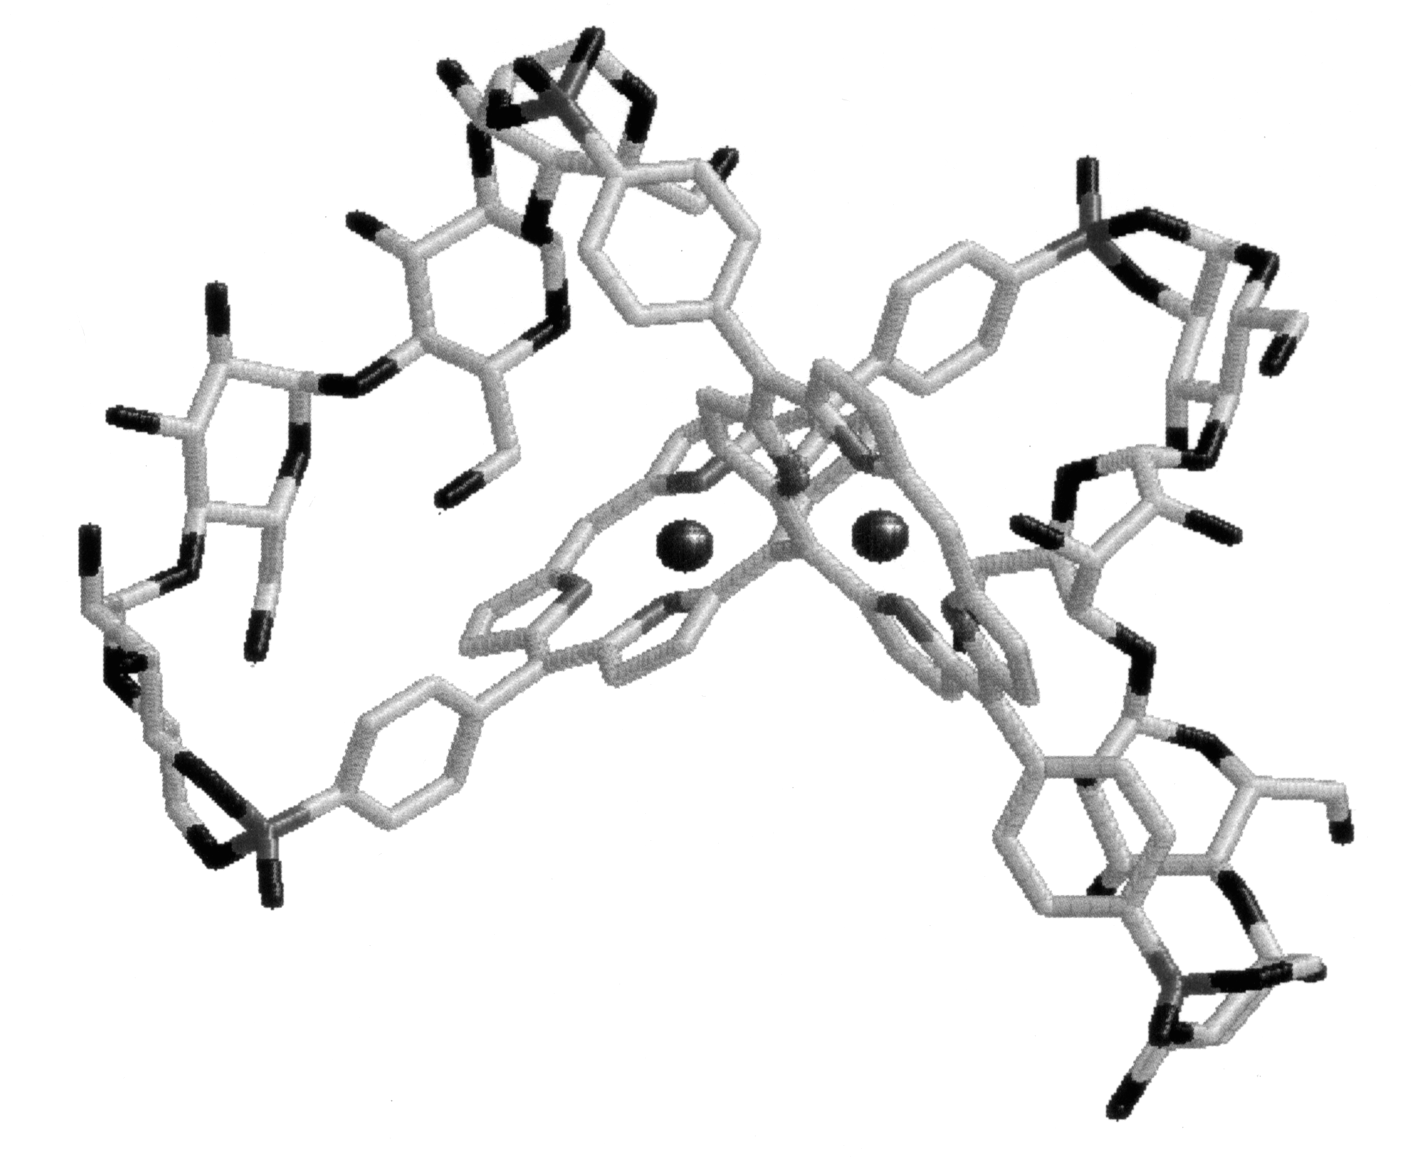


**Fig. B** Possible binding mode proposed on the basis of the Job plot and computational studies.
